# Supplementary material
Source: PubMed Central journal article supplement (PMC6130398)
Supplement: pnas.1714250115.sapp.pdf [file pnas.1714250115.sapp.pdf]

## Supplementary Information for

### Viral Genetic Diversity and Protective Efficacy of a Tetravalent Dengue Vaccine in Two Phase 3 Trials

Michal Juraska, Craig A. Magaret, Jason Shao, Lindsay N. Carpp, Andrew J. Fiore-Gartland, David Benkeser, Yves Girerd-Chambaz, Edith Langevin, Carina Frago, Bruno Guy, Nicholas Jackson, Kien Duong Thi Hue, Cameron P. Simmons, Paul T. Edlefsen, Peter B. Gilbert\*

Peter B. Gilbert, Ph.D.  
Email: [pgilbert@ssharp.org](mailto:pgilbert@ssharp.org)

This PDF file includes:

Supplementary text  
Figs. S1 to S11  
Tables S1 to S4  
References for SI reference citations

## Supplementary text

### *Sets of amino acid positions - solvent accessible*

We analyzed sets of AA positions with a solvent accessibility surface (SAS)  $\geq 0.25$ . The scores were assessed using atomic models built by homology modeling<sup>1</sup> based on the published M and E crystal structures of the mature virion. The SAS of each residue is calculated by comparison to a control tripeptide where the target residue is sandwiched between two glycine residues, defined as 100% accessibility. This calculation is performed for M/E in the mature virion state; the highest value (representing maximum accessibility) was used for analysis.

CYD14 2–8-Year-Olds

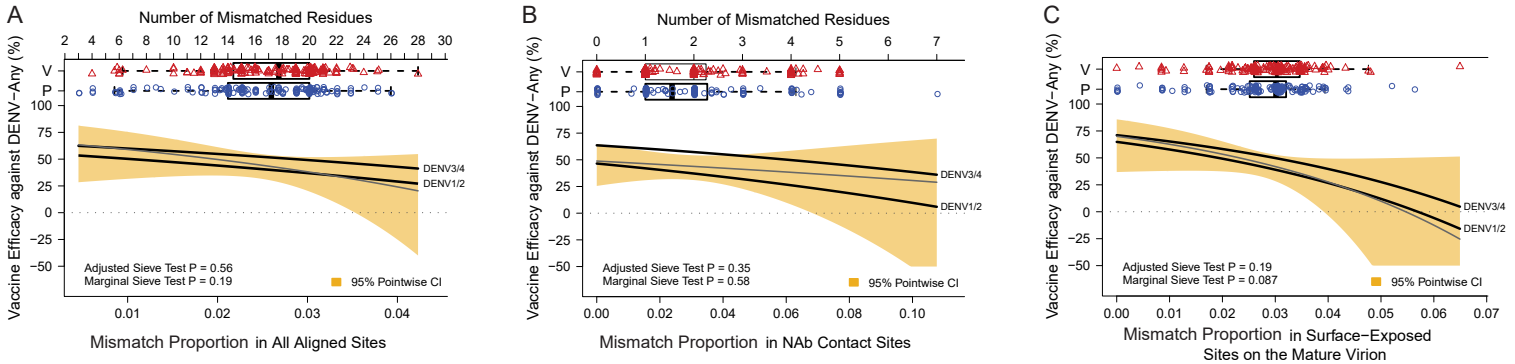

CYD14 9–14-Year-Olds

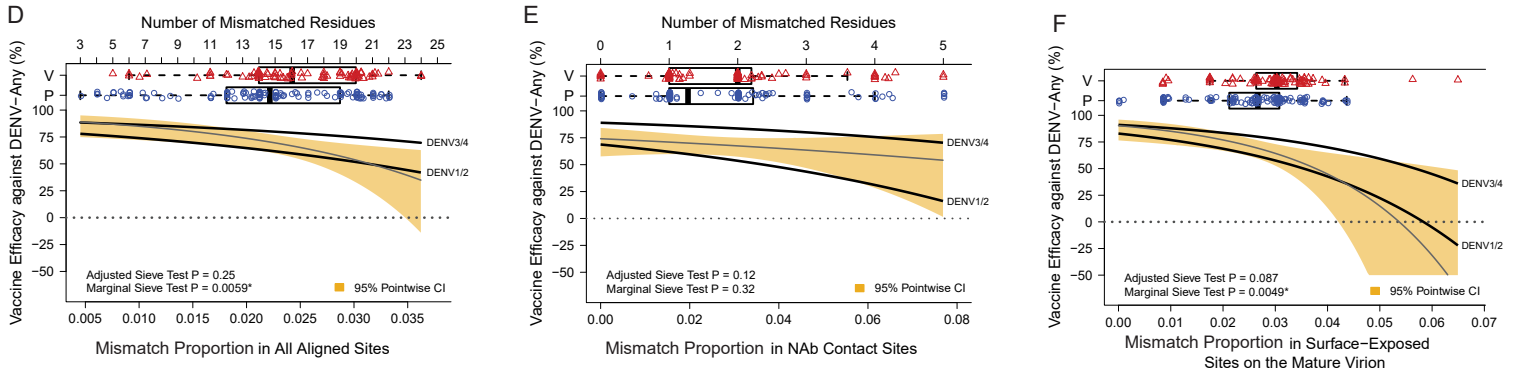\* Unadjusted P-value  $\leq 0.05$  and Q-value  $\leq 0.2$ 

**Fig. S1.** Vaccine efficacy against DENV-Any by percent residue mismatch in (A, D) all aligned sites<sup>†</sup>, (B, E) neutralizing antibody (NAb) contact sites, and (C<sup>‡</sup>, F<sup>‡</sup>) surface-exposed sites on the mature virion in the ITT cohort of CYD14 2–8-year-olds (A – C) and 9–14-year-olds (D – F). <sup>†</sup>The only alignment gap reflects that DENV3 sequences are characteristically missing AA at alignment positions 322 and 323. <sup>‡</sup>The number of surface-exposed sites on the mature virion varies by serotype (229, 231, 225, and 236 for DENV1, DENV2, DENV3, and DENV4, respectively), hence no common top axis is displayed in panels C and F.

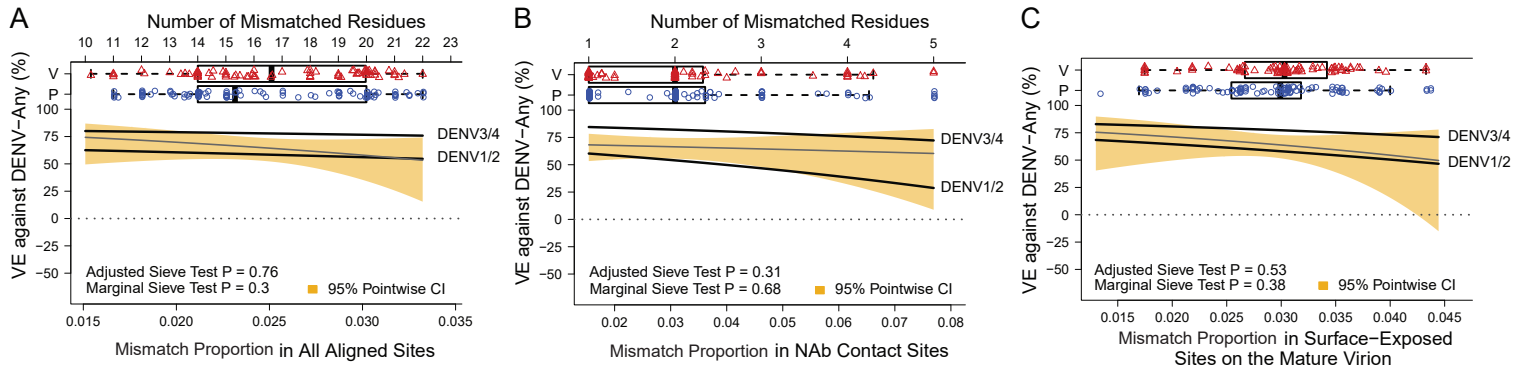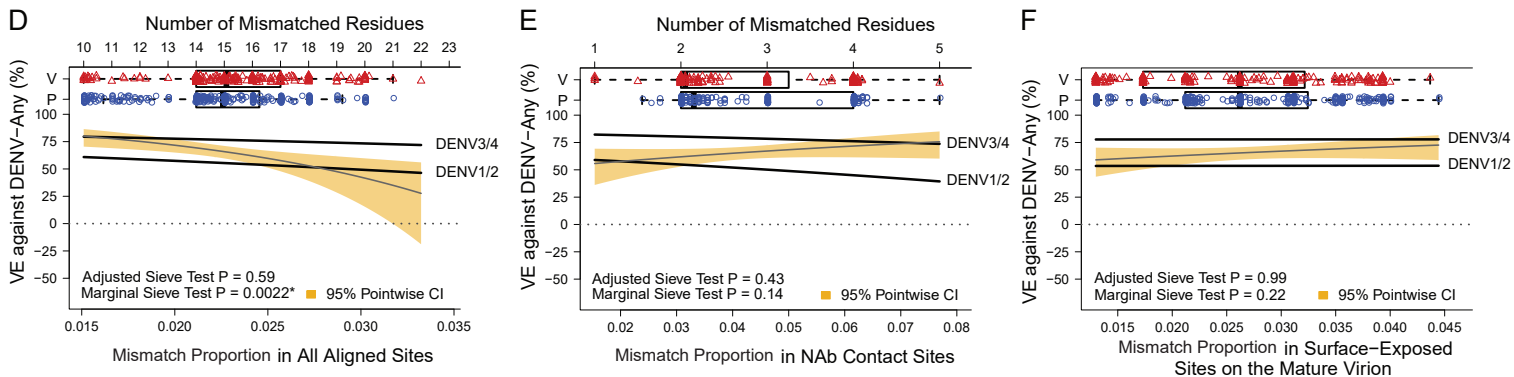

\* Unadjusted P-value  $\leq 0.05$  and Q-value  $\leq 0.2$

**Fig. S2.** Vaccine efficacy against DENV-Any by percent residue mismatch, restricting to the common range of amino acid mismatches, in (A, D) all aligned sites<sup>†</sup>, (B, E) neutralizing antibody (NAb) contact sites, and (C<sup>‡</sup>, F<sup>‡</sup>) surface-exposed sites on the mature virion in the ITT cohort of CYD14 9–14-year-olds (A – C) and CYD15 9–14-year-olds (D – F). <sup>†</sup>The only alignment gap reflects that DENV3 sequences are characteristically missing AA at alignment positions 322 and 323. <sup>‡</sup>The number of surface-exposed sites on the mature virion varies by serotype (229, 231, 225, and 236 for DENV1, DENV2, DENV3, and DENV4, respectively), hence no common top axis is displayed in panels C and F.

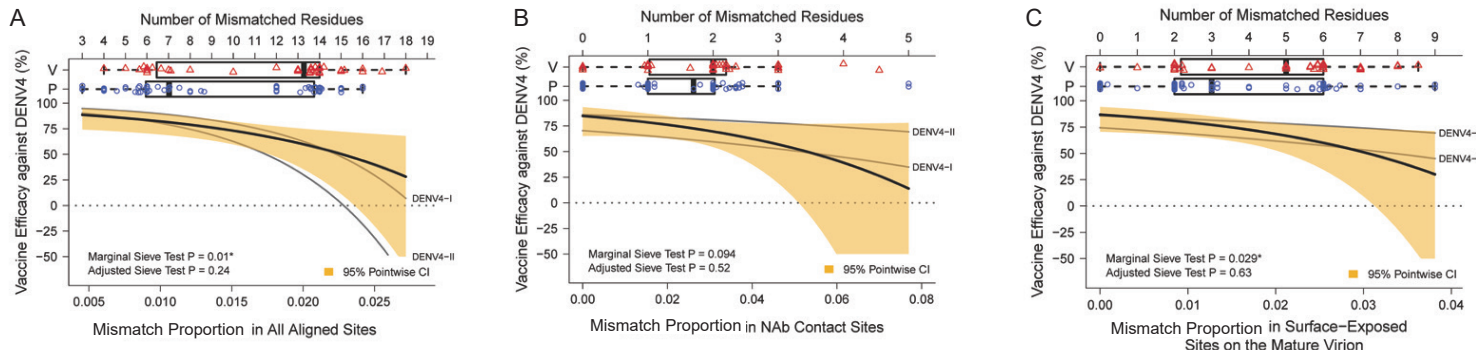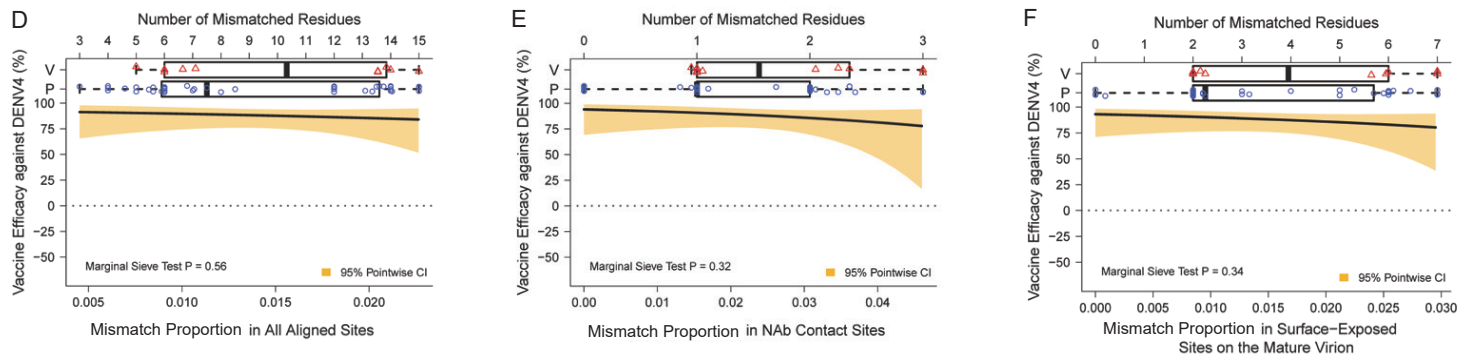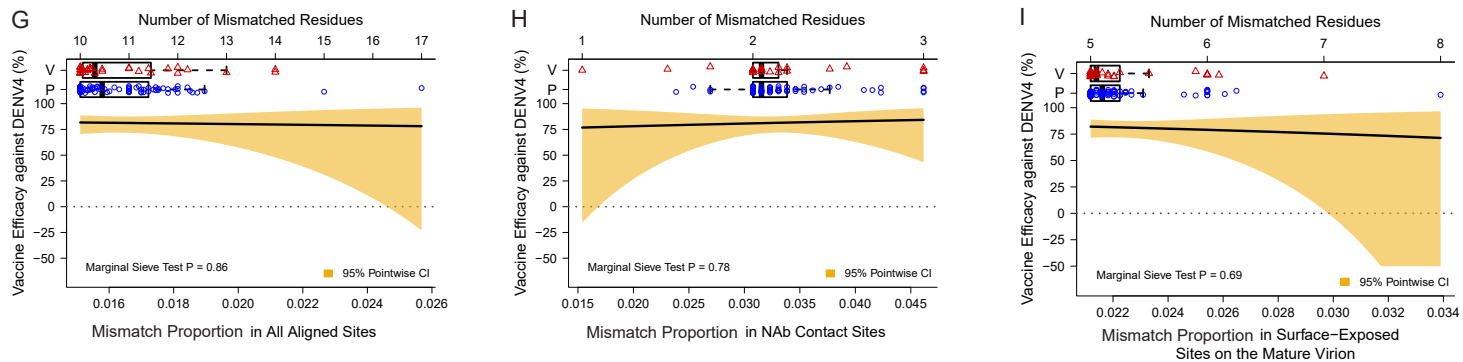

\* Unadjusted P-value  $\leq 0.05$  and Q-value  $\leq 0.2$

**Fig. S3.** Vaccine efficacy against DENV4 by percent residue mismatch in: (A, D, G) all aligned sites; (B, E, H) neutralizing antibody (NAb) contact sites; and (C, F, I) surface-exposed sites on the mature virion, observed in: (A - C) the ITT cohort pooling over both age categories in CYD14; (D - F) the ITT cohort of 9–14-year-olds in CYD14; and (G - I) the ITT cohort of CYD15.

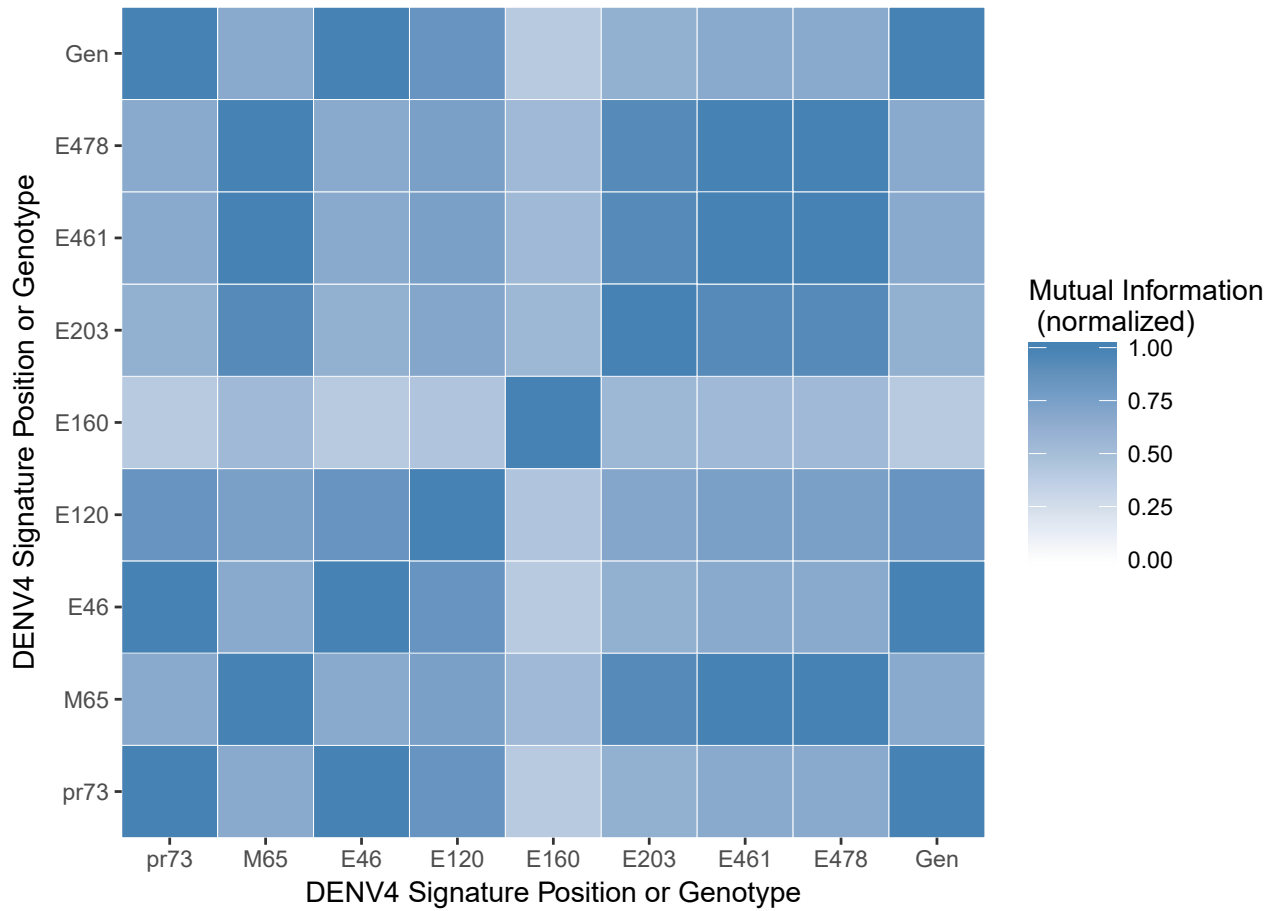

**Fig. S4.** Covariation between pairs of DENV4 signature positions in the ITT cohort of 2–8-year-olds. All unadjusted covariation test P-values were  $< 0.001$ .

### A CYD14 2-14-Year-Olds

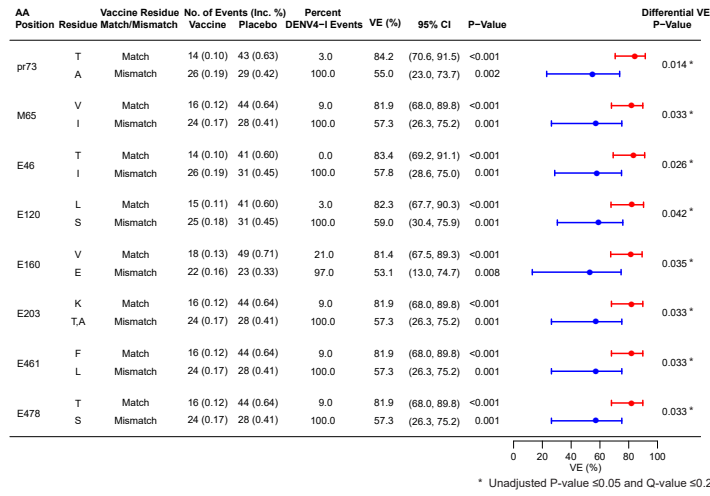

### B CYD14 9-14-Year-Olds

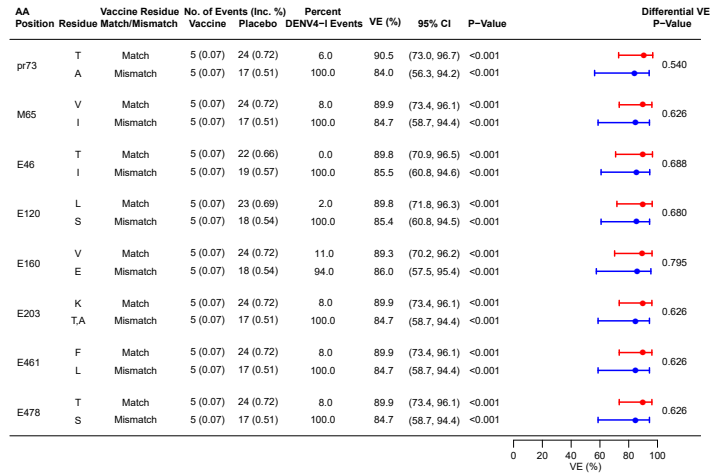

### C CYD15 9-16-Year-Olds

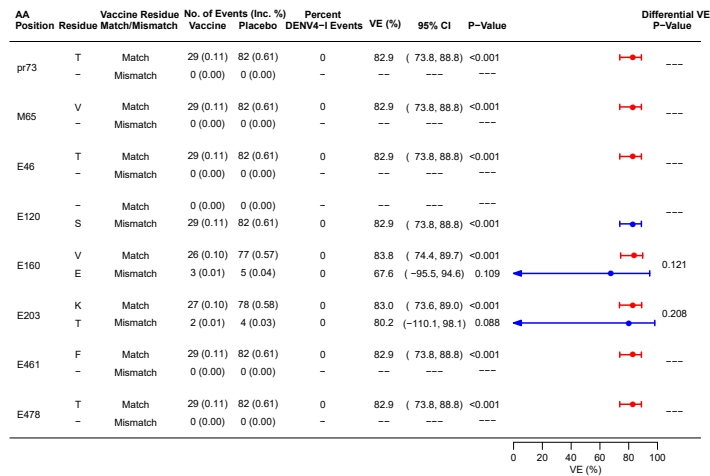

**Fig. S5.** Vaccine efficacy (VE) against DENV4 with a vaccine-matched and mismatched residue at signature amino acid (AA) positions in the ITT cohorts of (A) CYD14, pooling over both age categories; (B) CYD14, 9-14-year-olds; and (C) CYD15.

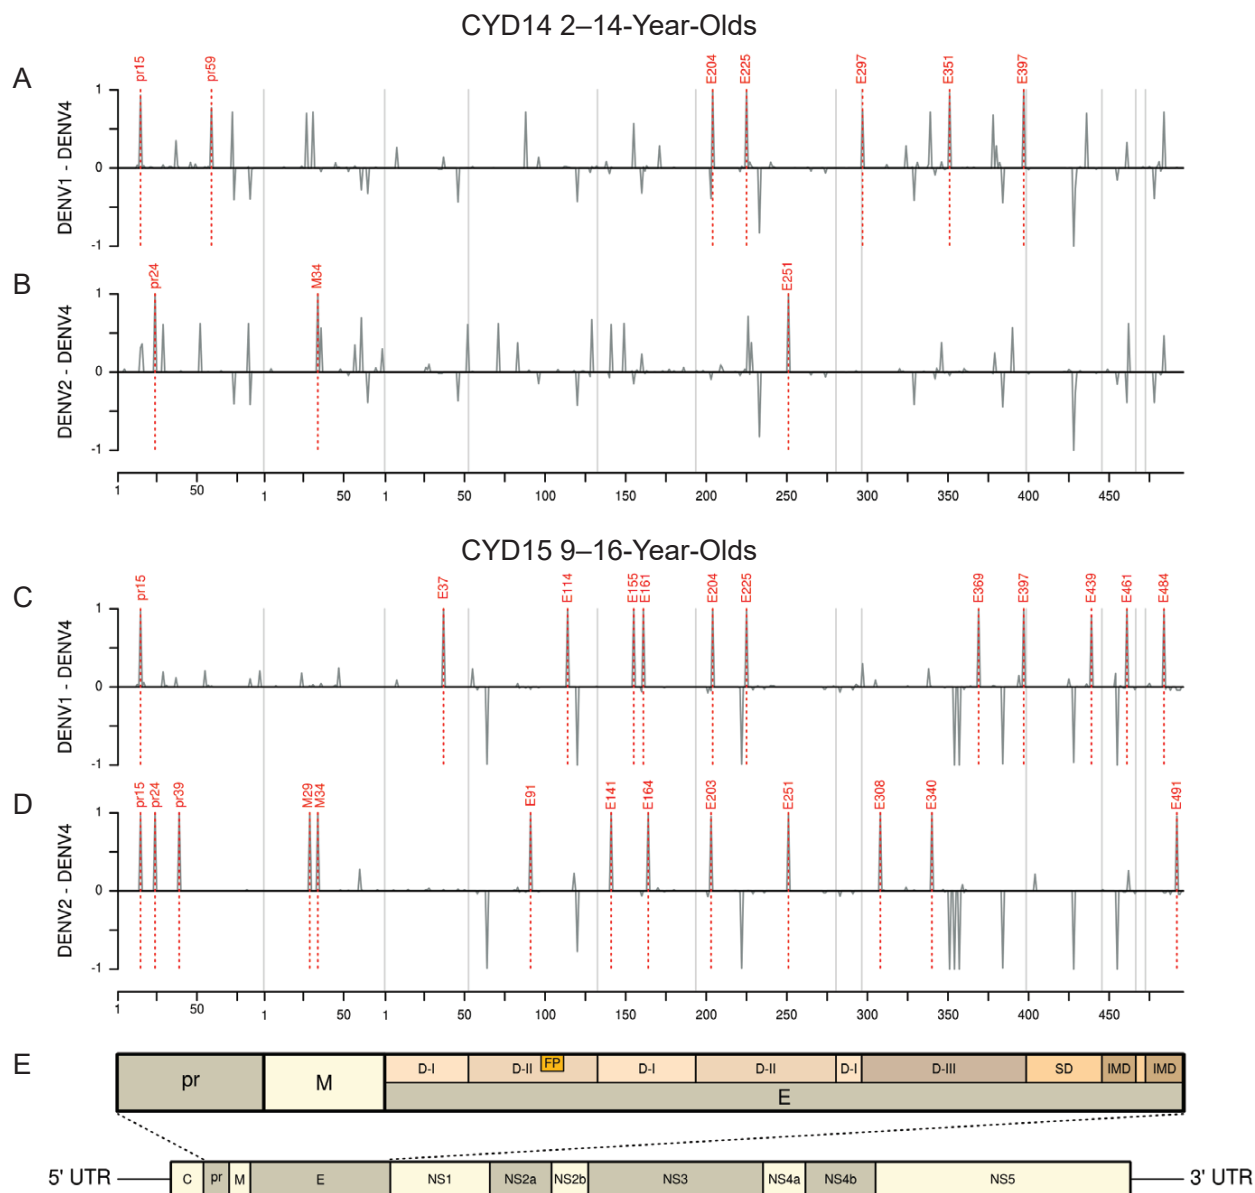

**Fig. S6.** Difference in the prevalence of vaccine-mismatched residues comparing (A) DENV1 to DENV4 placebo case sequences pooling over both age categories in CYD14, (B) DENV2 to DENV4 placebo case sequences in the ITT cohort pooling over both age categories in CYD14, (C) DENV1 to DENV4 placebo case sequences in the ITT cohort of CYD15, and (D) DENV2 to DENV4 placebo case sequences in the ITT cohort of CYD15. Panel (E) shows a schematic diagram of the DENV genome, with an enlarged version of the prM/E region showing the domain structure of the E protein. FP, fusion peptide. SD, stem domain. IMD, intramembrane domain. UTR, untranslated region.



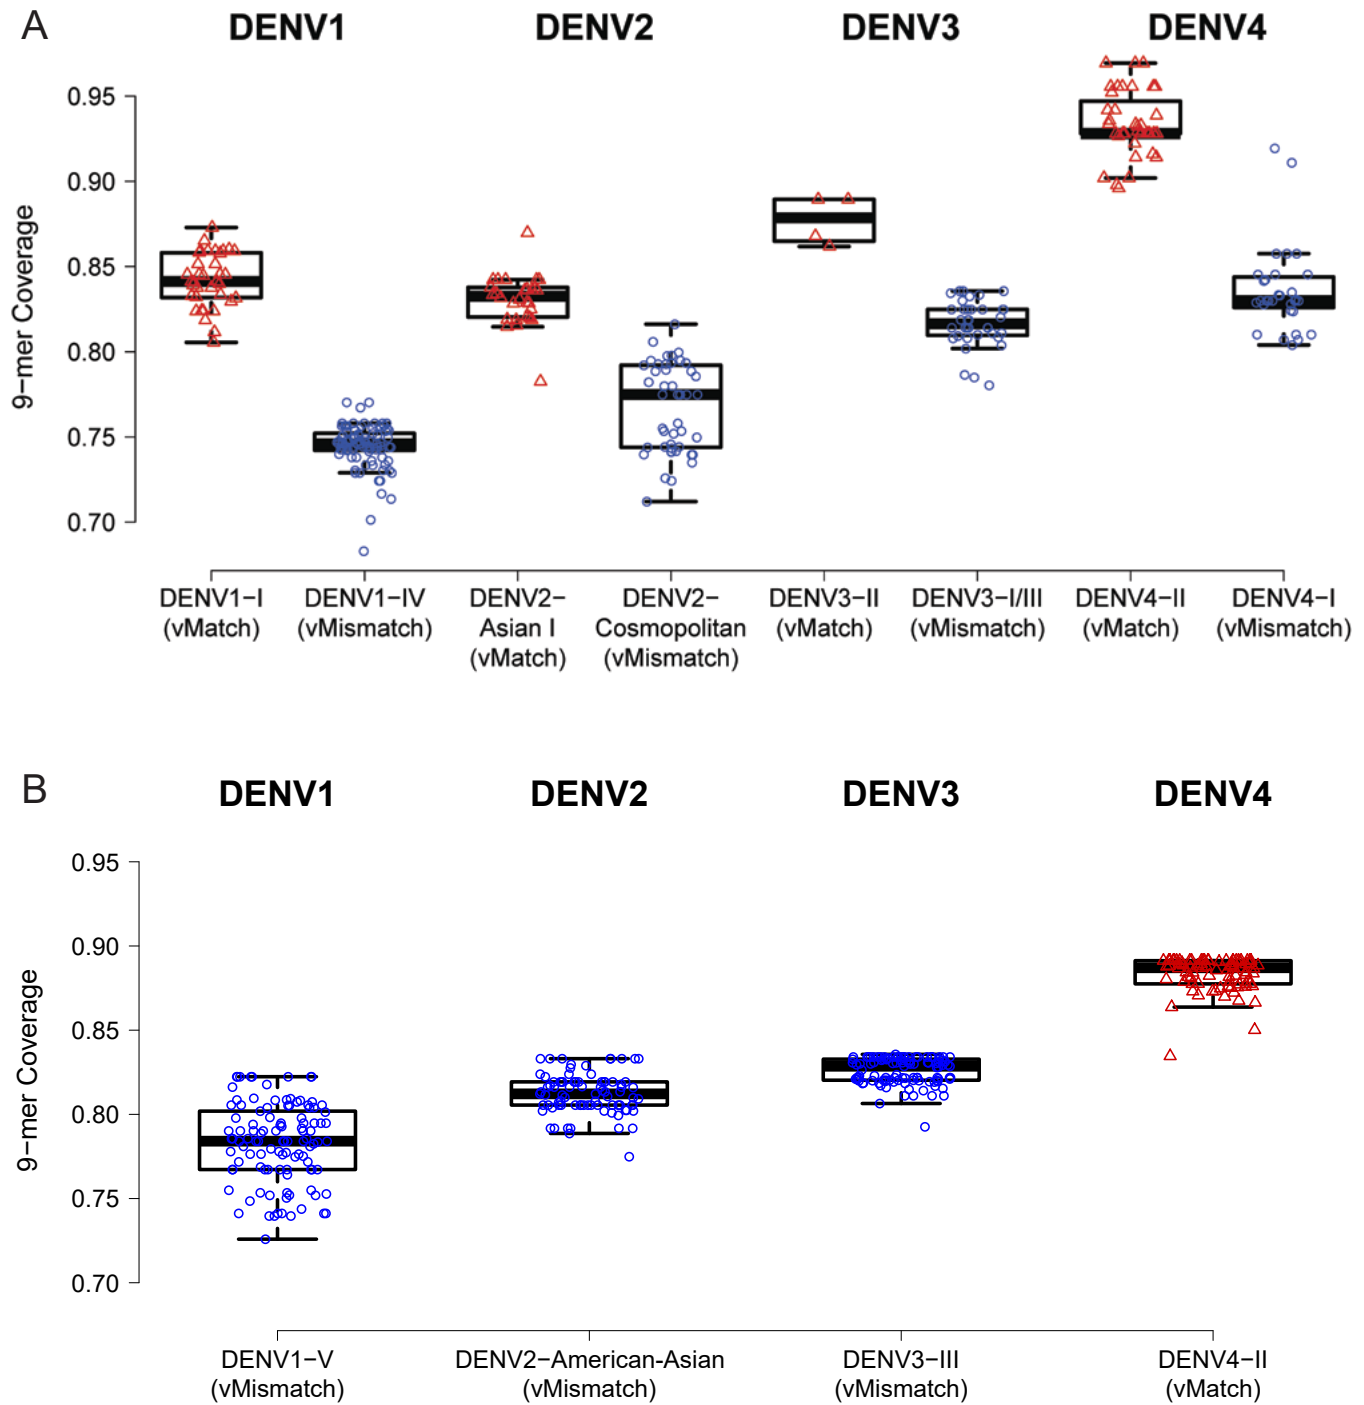

**Fig. S7.** 9-mer coverage of placebo case sequences by the vaccine strains in the ITT cohorts of (A) CYD14, pooling over both age categories, and (B) CYD15.

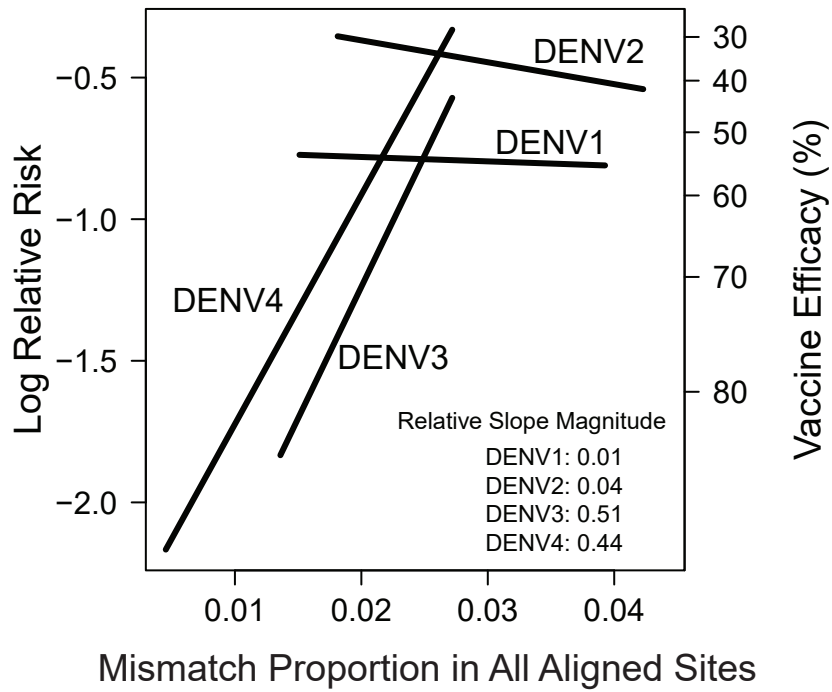

**Fig. S8.** Log relative risks of the serotype-specific dengue endpoints by residue mismatch proportion in all aligned AA positions in the ITT cohort of CYD14 2–14-year-olds. The relative slope magnitude for serotype  $i$  is defined as  $|s_i|/(|s_1|+|s_2|+|s_3|+|s_4|)$ , where  $s_i$  is the linear slope of the curve for serotype  $i$ .

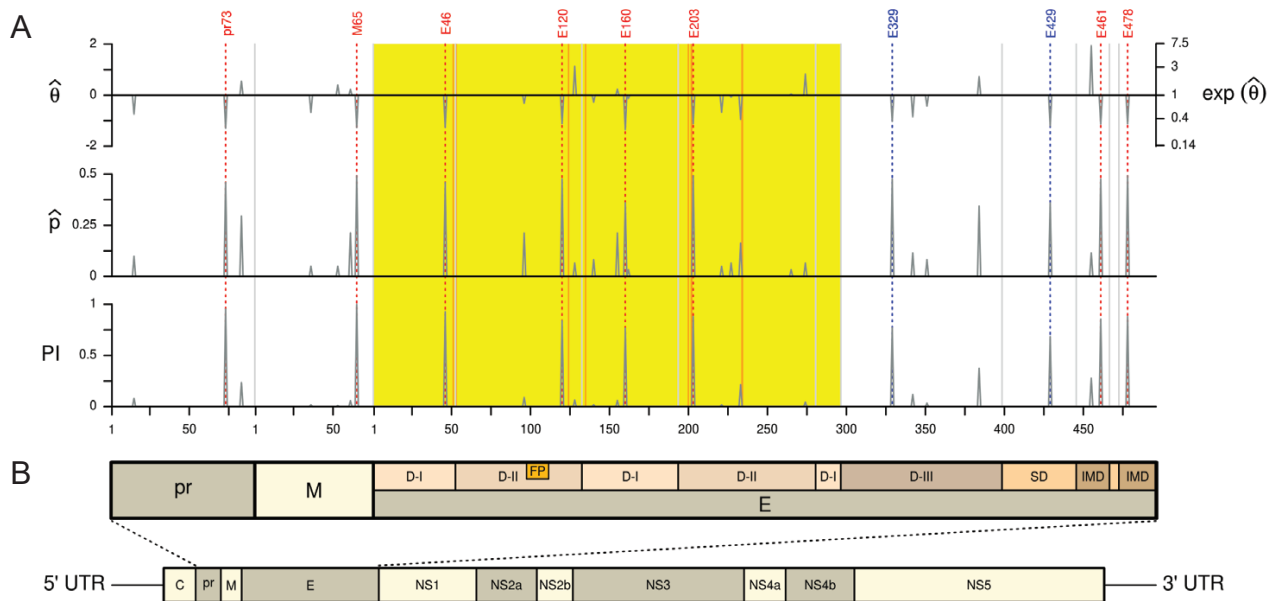

**Fig. S9.** Influence of amino acid positions on the DENV4 sieve effect in the ITT cohort of 2–8-year-olds. (A) Influence of amino acid positions on the DENV4 sieve effect, and (B) schematic diagram of the DENV genome. The top panel of (A) shows the degree of estimated differential vaccine efficacy (VE) against DENV4 with a residue match vs. mismatch to the vaccine at amino acid position  $i$  indexed on the x-axis, measured as the estimated log hazard ratio (vaccine/placebo) of matched-DENV4 minus this estimate for mismatched-DENV4 (left y-axis label), and the right y-axis label is the ratio of hazard ratios measuring how much greater VE is against matched than mismatched DENV4. The middle panel of (A) shows the estimated prevalence of the minority residue (match or mismatch) at position  $i$  among DENV4 placebo recipient cases, which measures the diversity of the position in circulating DENV4 sequences and hence the degree of influence that differential VE at the position can potentially have on overall VE against DENV4. The third panel of (A) shows the amino acid position influence (PI), which multiplies a 0–1 scaled version of the top panel value with a 0–1 scaled version of the middle panel value, and then is again re-scaled between 0–1. A higher value of PI indicates that the amino acid position has more influence on the overall VE against DENV4. Signature positions where VE was significantly greater against DENV4 match than mismatch are indicated by vertical red dotted lines. An additional influential position with greater VE against DENV4 match than mismatch and  $PI \geq 0.25$  is indicated by a vertical blue dotted line. Epitopes of two isolated DENV4-specific human monoclonal neutralizing antibodies, DV4-126 and DV4-131, were mapped to the region indicated in yellow.<sup>2</sup> Residues at positions indicated by vertical orange solid lines were identified as critical for DV4-126 and DV4-131 binding to DENV4. (B) shows a schematic diagram of the DENV genome, with an enlarged version of the prM/E region showing the domain structure of the E protein. FP, fusion peptide. SD, stem domain. IMD, intramembrane domain. UTR, untranslated region.

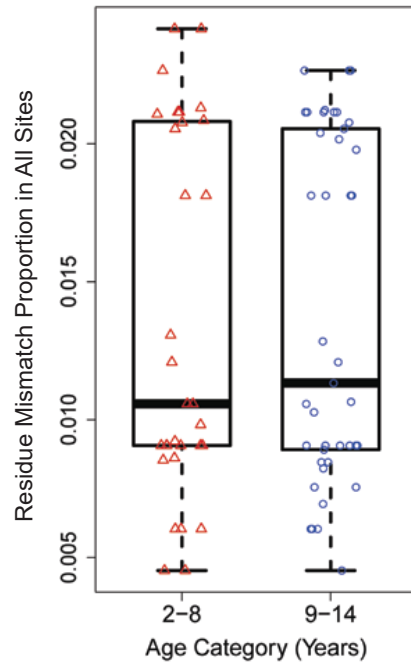

**Fig. S10.** Residue mismatch proportion to the DENV4 vaccine sequence for all sites in the placebo group's DENV4 ITT cases by age category in CYD14.

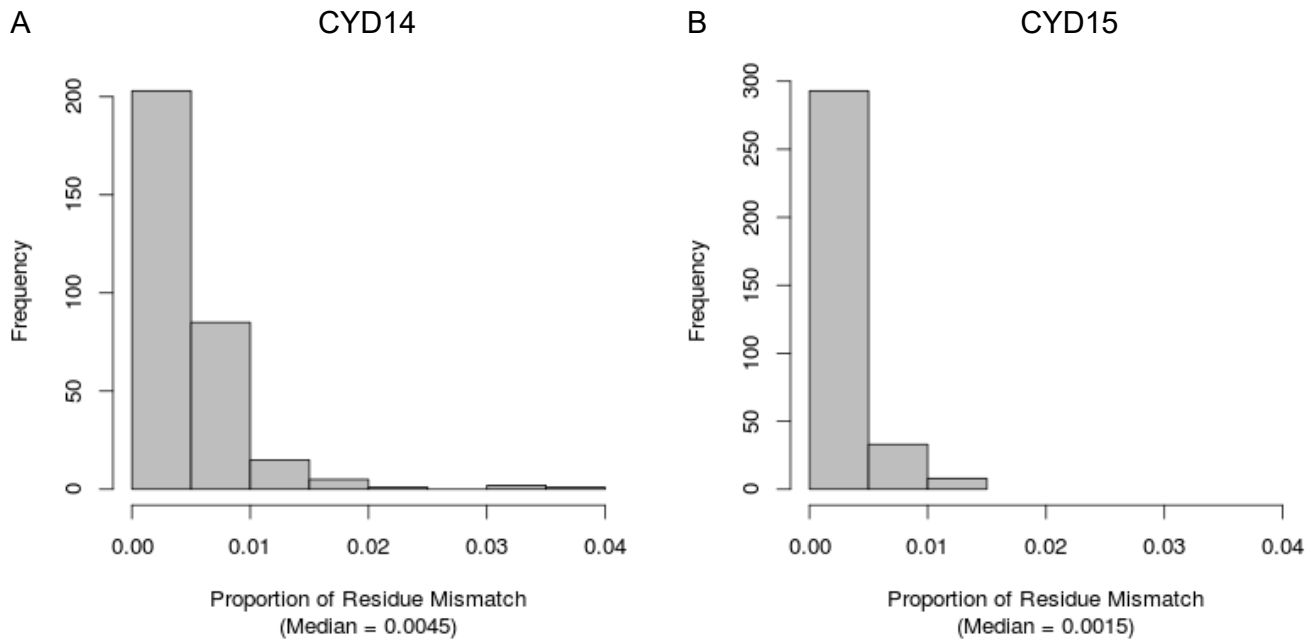

**Fig. S11.** Distribution of mean proportion residue mismatch between complete sequences observed in proximal virologically confirmed dengue (VCD) cases in the ITT cohorts of (A) CYD14 and (B) CYD15. Mean proportion residue mismatch between complete sequences observed in proximal VCD cases in the ITT cohorts of CYD14 and CYD15 was calculated by pooling serotype-matched observed sequences from the most-geographically constrained region (in increasing order: clinic vs. site vs. country) according to the specified sequence imputation process. The accuracy of the sequence imputation process was evaluated by assessing the mean proportion residue mismatch between each observed sequence and the respective observed proximal sequences as determined by each of the three described algorithms. In this analysis, amino acid positions with missing flanking residues were ignored.

**Table S1. Numbers of virologically confirmed dengue (VCD) endpoint cases in the ITT cohorts of (A) CYD14 and (B) CYD15 with complete and imputed sequence data. (C) Amino acid positions with sufficient variability in the ITT cohort of CYD14.**

| <b>A. Numbers of VCD endpoint cases in the ITT cohort of CYD14 with complete and imputed sequence data</b> |                                 |                          |            |                |                                                                                                                                                                                                                                                                                                                                                                                                                                                                                                                                                                                                                                                                                                                                                                                                                                                                                                                                                                                                                                                                                                                                                                                                                                                                                                                                                                                                                                                                                                                                                                                                                                                                                                                                                                                                             |          |          |          |                         |          |             |          |                |          |                 |          |
|------------------------------------------------------------------------------------------------------------|---------------------------------|--------------------------|------------|----------------|-------------------------------------------------------------------------------------------------------------------------------------------------------------------------------------------------------------------------------------------------------------------------------------------------------------------------------------------------------------------------------------------------------------------------------------------------------------------------------------------------------------------------------------------------------------------------------------------------------------------------------------------------------------------------------------------------------------------------------------------------------------------------------------------------------------------------------------------------------------------------------------------------------------------------------------------------------------------------------------------------------------------------------------------------------------------------------------------------------------------------------------------------------------------------------------------------------------------------------------------------------------------------------------------------------------------------------------------------------------------------------------------------------------------------------------------------------------------------------------------------------------------------------------------------------------------------------------------------------------------------------------------------------------------------------------------------------------------------------------------------------------------------------------------------------------|----------|----------|----------|-------------------------|----------|-------------|----------|----------------|----------|-----------------|----------|
| <b>All Study Participants</b>                                                                              |                                 |                          |            |                |                                                                                                                                                                                                                                                                                                                                                                                                                                                                                                                                                                                                                                                                                                                                                                                                                                                                                                                                                                                                                                                                                                                                                                                                                                                                                                                                                                                                                                                                                                                                                                                                                                                                                                                                                                                                             |          |          |          |                         |          |             |          |                |          |                 |          |
| <b>Endpoint</b>                                                                                            | <b>Cases with Complete Seqs</b> |                          |            |                | <b>Cases with Imputed Seqs</b>                                                                                                                                                                                                                                                                                                                                                                                                                                                                                                                                                                                                                                                                                                                                                                                                                                                                                                                                                                                                                                                                                                                                                                                                                                                                                                                                                                                                                                                                                                                                                                                                                                                                                                                                                                              |          |          |          | <b>Imputation Level</b> |          |             |          |                |          |                 |          |
|                                                                                                            | <b>V</b>                        |                          | <b>P</b>   |                | <b>V</b>                                                                                                                                                                                                                                                                                                                                                                                                                                                                                                                                                                                                                                                                                                                                                                                                                                                                                                                                                                                                                                                                                                                                                                                                                                                                                                                                                                                                                                                                                                                                                                                                                                                                                                                                                                                                    |          | <b>P</b> |          | <b>Clinic</b>           |          | <b>Site</b> |          | <b>Country</b> |          | <b>Excluded</b> |          |
|                                                                                                            | <b>V</b>                        | <b>P</b>                 | <b>V</b>   | <b>P</b>       | <b>V</b>                                                                                                                                                                                                                                                                                                                                                                                                                                                                                                                                                                                                                                                                                                                                                                                                                                                                                                                                                                                                                                                                                                                                                                                                                                                                                                                                                                                                                                                                                                                                                                                                                                                                                                                                                                                                    | <b>P</b> | <b>V</b> | <b>P</b> | <b>V</b>                | <b>P</b> | <b>V</b>    | <b>P</b> | <b>V</b>       | <b>P</b> | <b>V</b>        | <b>P</b> |
| DENV-Any                                                                                                   | 147                             | 165                      | 131        | 134            | 117                                                                                                                                                                                                                                                                                                                                                                                                                                                                                                                                                                                                                                                                                                                                                                                                                                                                                                                                                                                                                                                                                                                                                                                                                                                                                                                                                                                                                                                                                                                                                                                                                                                                                                                                                                                                         | 120      | 11       | 9        | 3                       | 5        | 1           | 3        | 0              | 0        | 1               | 3        |
| DENV1                                                                                                      | 55                              | 69                       | 61         | 57             | 58                                                                                                                                                                                                                                                                                                                                                                                                                                                                                                                                                                                                                                                                                                                                                                                                                                                                                                                                                                                                                                                                                                                                                                                                                                                                                                                                                                                                                                                                                                                                                                                                                                                                                                                                                                                                          | 56       | 3        | 1        | 0                       | 0        | 0           | 0        | 0              | 0        | 0               | 0        |
| DENV2                                                                                                      | 56                              | 36                       | 41         | 38             | 34                                                                                                                                                                                                                                                                                                                                                                                                                                                                                                                                                                                                                                                                                                                                                                                                                                                                                                                                                                                                                                                                                                                                                                                                                                                                                                                                                                                                                                                                                                                                                                                                                                                                                                                                                                                                          | 32       | 7        | 5        | 0                       | 1        | 0           | 1        | 0              | 0        | 0               | 0        |
| DENV3                                                                                                      | 13                              | 25                       | 16         | 15             | 14                                                                                                                                                                                                                                                                                                                                                                                                                                                                                                                                                                                                                                                                                                                                                                                                                                                                                                                                                                                                                                                                                                                                                                                                                                                                                                                                                                                                                                                                                                                                                                                                                                                                                                                                                                                                          | 11       | 0        | 2        | 2                       | 2        | 2           | 2        | 1              | 1        | 3               | 3        |
| DENV4                                                                                                      | 27                              | 42                       | 13         | 30             | 11                                                                                                                                                                                                                                                                                                                                                                                                                                                                                                                                                                                                                                                                                                                                                                                                                                                                                                                                                                                                                                                                                                                                                                                                                                                                                                                                                                                                                                                                                                                                                                                                                                                                                                                                                                                                          | 27       | 1        | 1        | 1                       | 2        | 2           | 2        | 0              | 0        | 0               | 0        |
| <b>2–8-Year-Old Participants Only</b>                                                                      |                                 |                          |            |                |                                                                                                                                                                                                                                                                                                                                                                                                                                                                                                                                                                                                                                                                                                                                                                                                                                                                                                                                                                                                                                                                                                                                                                                                                                                                                                                                                                                                                                                                                                                                                                                                                                                                                                                                                                                                             |          |          |          |                         |          |             |          |                |          |                 |          |
| <b>Endpoint</b>                                                                                            | <b>Cases with Complete Seqs</b> |                          |            |                | <b>Cases with Imputed Seqs</b>                                                                                                                                                                                                                                                                                                                                                                                                                                                                                                                                                                                                                                                                                                                                                                                                                                                                                                                                                                                                                                                                                                                                                                                                                                                                                                                                                                                                                                                                                                                                                                                                                                                                                                                                                                              |          |          |          | <b>Imputation Level</b> |          |             |          |                |          |                 |          |
|                                                                                                            | <b>V</b>                        |                          | <b>P</b>   |                | <b>V</b>                                                                                                                                                                                                                                                                                                                                                                                                                                                                                                                                                                                                                                                                                                                                                                                                                                                                                                                                                                                                                                                                                                                                                                                                                                                                                                                                                                                                                                                                                                                                                                                                                                                                                                                                                                                                    |          | <b>P</b> |          | <b>Clinic</b>           |          | <b>Site</b> |          | <b>Country</b> |          | <b>Excluded</b> |          |
|                                                                                                            | <b>V</b>                        | <b>P</b>                 | <b>V</b>   | <b>P</b>       | <b>V</b>                                                                                                                                                                                                                                                                                                                                                                                                                                                                                                                                                                                                                                                                                                                                                                                                                                                                                                                                                                                                                                                                                                                                                                                                                                                                                                                                                                                                                                                                                                                                                                                                                                                                                                                                                                                                    | <b>P</b> | <b>V</b> | <b>P</b> | <b>V</b>                | <b>P</b> | <b>V</b>    | <b>P</b> | <b>V</b>       | <b>P</b> | <b>V</b>        | <b>P</b> |
| DENV-Any                                                                                                   | 107                             | 89                       | 84         | 78             | 72                                                                                                                                                                                                                                                                                                                                                                                                                                                                                                                                                                                                                                                                                                                                                                                                                                                                                                                                                                                                                                                                                                                                                                                                                                                                                                                                                                                                                                                                                                                                                                                                                                                                                                                                                                                                          | 70       | 10       | 6        | 2                       | 2        | 0           | 0        | 0              | 0        | 1               | 1        |
| DENV1                                                                                                      | 41                              | 42                       | 39         | 32             | 36                                                                                                                                                                                                                                                                                                                                                                                                                                                                                                                                                                                                                                                                                                                                                                                                                                                                                                                                                                                                                                                                                                                                                                                                                                                                                                                                                                                                                                                                                                                                                                                                                                                                                                                                                                                                          | 31       | 3        | 1        | 0                       | 0        | 0           | 0        | 0              | 0        | 0               | 0        |
| DENV2                                                                                                      | 39                              | 23                       | 25         | 25             | 19                                                                                                                                                                                                                                                                                                                                                                                                                                                                                                                                                                                                                                                                                                                                                                                                                                                                                                                                                                                                                                                                                                                                                                                                                                                                                                                                                                                                                                                                                                                                                                                                                                                                                                                                                                                                          | 22       | 6        | 3        | 0                       | 0        | 0           | 0        | 0              | 0        | 0               | 0        |
| DENV3                                                                                                      | 8                               | 14                       | 11         | 10             | 10                                                                                                                                                                                                                                                                                                                                                                                                                                                                                                                                                                                                                                                                                                                                                                                                                                                                                                                                                                                                                                                                                                                                                                                                                                                                                                                                                                                                                                                                                                                                                                                                                                                                                                                                                                                                          | 9        | 0        | 1        | 1                       | 0        | 0           | 0        | 0              | 0        | 1               | 1        |
| DENV4                                                                                                      | 21                              | 16                       | 9          | 15             | 7                                                                                                                                                                                                                                                                                                                                                                                                                                                                                                                                                                                                                                                                                                                                                                                                                                                                                                                                                                                                                                                                                                                                                                                                                                                                                                                                                                                                                                                                                                                                                                                                                                                                                                                                                                                                           | 12       | 1        | 1        | 1                       | 2        | 2           | 0        | 0              | 0        | 0               | 0        |
| <b>9–14-Year-Old Participants Only</b>                                                                     |                                 |                          |            |                |                                                                                                                                                                                                                                                                                                                                                                                                                                                                                                                                                                                                                                                                                                                                                                                                                                                                                                                                                                                                                                                                                                                                                                                                                                                                                                                                                                                                                                                                                                                                                                                                                                                                                                                                                                                                             |          |          |          |                         |          |             |          |                |          |                 |          |
| <b>Endpoint</b>                                                                                            | <b>Cases with Complete Seqs</b> |                          |            |                | <b>Cases with Imputed Seqs</b>                                                                                                                                                                                                                                                                                                                                                                                                                                                                                                                                                                                                                                                                                                                                                                                                                                                                                                                                                                                                                                                                                                                                                                                                                                                                                                                                                                                                                                                                                                                                                                                                                                                                                                                                                                              |          |          |          | <b>Imputation Level</b> |          |             |          |                |          |                 |          |
|                                                                                                            | <b>V</b>                        |                          | <b>P</b>   |                | <b>V</b>                                                                                                                                                                                                                                                                                                                                                                                                                                                                                                                                                                                                                                                                                                                                                                                                                                                                                                                                                                                                                                                                                                                                                                                                                                                                                                                                                                                                                                                                                                                                                                                                                                                                                                                                                                                                    |          | <b>P</b> |          | <b>Clinic</b>           |          | <b>Site</b> |          | <b>Country</b> |          | <b>Excluded</b> |          |
|                                                                                                            | <b>V</b>                        | <b>P</b>                 | <b>V</b>   | <b>P</b>       | <b>V</b>                                                                                                                                                                                                                                                                                                                                                                                                                                                                                                                                                                                                                                                                                                                                                                                                                                                                                                                                                                                                                                                                                                                                                                                                                                                                                                                                                                                                                                                                                                                                                                                                                                                                                                                                                                                                    | <b>P</b> | <b>V</b> | <b>P</b> | <b>V</b>                | <b>P</b> | <b>V</b>    | <b>P</b> | <b>V</b>       | <b>P</b> | <b>V</b>        | <b>P</b> |
| DENV-Any                                                                                                   | 40                              | 76                       | 47         | 56             | 45                                                                                                                                                                                                                                                                                                                                                                                                                                                                                                                                                                                                                                                                                                                                                                                                                                                                                                                                                                                                                                                                                                                                                                                                                                                                                                                                                                                                                                                                                                                                                                                                                                                                                                                                                                                                          | 50       | 1        | 3        | 1                       | 3        | 1           | 3        | 1              | 2        | 2               | 2        |
| DENV1                                                                                                      | 14                              | 27                       | 22         | 25             | 22                                                                                                                                                                                                                                                                                                                                                                                                                                                                                                                                                                                                                                                                                                                                                                                                                                                                                                                                                                                                                                                                                                                                                                                                                                                                                                                                                                                                                                                                                                                                                                                                                                                                                                                                                                                                          | 25       | 0        | 0        | 0                       | 0        | 0           | 0        | 0              | 0        | 0               | 0        |
| DENV2                                                                                                      | 17                              | 13                       | 16         | 13             | 15                                                                                                                                                                                                                                                                                                                                                                                                                                                                                                                                                                                                                                                                                                                                                                                                                                                                                                                                                                                                                                                                                                                                                                                                                                                                                                                                                                                                                                                                                                                                                                                                                                                                                                                                                                                                          | 10       | 1        | 2        | 0                       | 1        | 0           | 1        | 0              | 0        | 0               | 0        |
| DENV3                                                                                                      | 5                               | 11                       | 5          | 5              | 4                                                                                                                                                                                                                                                                                                                                                                                                                                                                                                                                                                                                                                                                                                                                                                                                                                                                                                                                                                                                                                                                                                                                                                                                                                                                                                                                                                                                                                                                                                                                                                                                                                                                                                                                                                                                           | 2        | 0        | 1        | 1                       | 2        | 2           | 1        | 2              | 1        | 2               | 2        |
| DENV4                                                                                                      | 6                               | 26                       | 4          | 15             | 4                                                                                                                                                                                                                                                                                                                                                                                                                                                                                                                                                                                                                                                                                                                                                                                                                                                                                                                                                                                                                                                                                                                                                                                                                                                                                                                                                                                                                                                                                                                                                                                                                                                                                                                                                                                                           | 15       | 0        | 0        | 0                       | 0        | 0           | 0        | 0              | 0        | 0               | 0        |
| <b>B. Numbers of VCD endpoint cases in the ITT cohort of CYD15 with complete and imputed sequence data</b> |                                 |                          |            |                |                                                                                                                                                                                                                                                                                                                                                                                                                                                                                                                                                                                                                                                                                                                                                                                                                                                                                                                                                                                                                                                                                                                                                                                                                                                                                                                                                                                                                                                                                                                                                                                                                                                                                                                                                                                                             |          |          |          |                         |          |             |          |                |          |                 |          |
| <b>All Study Participants</b>                                                                              |                                 |                          |            |                |                                                                                                                                                                                                                                                                                                                                                                                                                                                                                                                                                                                                                                                                                                                                                                                                                                                                                                                                                                                                                                                                                                                                                                                                                                                                                                                                                                                                                                                                                                                                                                                                                                                                                                                                                                                                             |          |          |          |                         |          |             |          |                |          |                 |          |
| <b>Endpoint</b>                                                                                            | <b>Cases with Complete Seqs</b> |                          |            |                | <b>Cases with Imputed Seqs</b>                                                                                                                                                                                                                                                                                                                                                                                                                                                                                                                                                                                                                                                                                                                                                                                                                                                                                                                                                                                                                                                                                                                                                                                                                                                                                                                                                                                                                                                                                                                                                                                                                                                                                                                                                                              |          |          |          | <b>Imputation Level</b> |          |             |          |                |          |                 |          |
|                                                                                                            | <b>V</b>                        |                          | <b>P</b>   |                | <b>V</b>                                                                                                                                                                                                                                                                                                                                                                                                                                                                                                                                                                                                                                                                                                                                                                                                                                                                                                                                                                                                                                                                                                                                                                                                                                                                                                                                                                                                                                                                                                                                                                                                                                                                                                                                                                                                    |          | <b>P</b> |          | <b>Clinic</b>           |          | <b>Site</b> |          | <b>Country</b> |          | <b>Excluded</b> |          |
|                                                                                                            | <b>V</b>                        | <b>P</b>                 | <b>V</b>   | <b>P</b>       | <b>V</b>                                                                                                                                                                                                                                                                                                                                                                                                                                                                                                                                                                                                                                                                                                                                                                                                                                                                                                                                                                                                                                                                                                                                                                                                                                                                                                                                                                                                                                                                                                                                                                                                                                                                                                                                                                                                    | <b>P</b> | <b>V</b> | <b>P</b> | <b>V</b>                | <b>P</b> | <b>V</b>    | <b>P</b> | <b>V</b>       | <b>P</b> | <b>V</b>        | <b>P</b> |
| DENV-Any                                                                                                   | 134                             | 199                      | 125        | 173            | 125                                                                                                                                                                                                                                                                                                                                                                                                                                                                                                                                                                                                                                                                                                                                                                                                                                                                                                                                                                                                                                                                                                                                                                                                                                                                                                                                                                                                                                                                                                                                                                                                                                                                                                                                                                                                         | 169      | 0        | 0        | 0                       | 4        | 3           | 1        | 3              | 1        | 1               | 1        |
| DENV1                                                                                                      | 53                              | 76                       | 46         | 33             | 46                                                                                                                                                                                                                                                                                                                                                                                                                                                                                                                                                                                                                                                                                                                                                                                                                                                                                                                                                                                                                                                                                                                                                                                                                                                                                                                                                                                                                                                                                                                                                                                                                                                                                                                                                                                                          | 33       | 0        | 0        | 0                       | 0        | 0           | 0        | 0              | 0        | 0               | 0        |
| DENV2                                                                                                      | 48                              | 50                       | 35         | 33             | 35                                                                                                                                                                                                                                                                                                                                                                                                                                                                                                                                                                                                                                                                                                                                                                                                                                                                                                                                                                                                                                                                                                                                                                                                                                                                                                                                                                                                                                                                                                                                                                                                                                                                                                                                                                                                          | 33       | 0        | 0        | 0                       | 0        | 0           | 0        | 0              | 0        | 0               | 0        |
| DENV3                                                                                                      | 23                              | 47                       | 32         | 59             | 32                                                                                                                                                                                                                                                                                                                                                                                                                                                                                                                                                                                                                                                                                                                                                                                                                                                                                                                                                                                                                                                                                                                                                                                                                                                                                                                                                                                                                                                                                                                                                                                                                                                                                                                                                                                                          | 59       | 0        | 0        | 0                       | 0        | 0           | 0        | 0              | 0        | 0               | 0        |
| DENV4                                                                                                      | 11                              | 31                       | 18         | 51             | 18                                                                                                                                                                                                                                                                                                                                                                                                                                                                                                                                                                                                                                                                                                                                                                                                                                                                                                                                                                                                                                                                                                                                                                                                                                                                                                                                                                                                                                                                                                                                                                                                                                                                                                                                                                                                          | 47       | 0        | 0        | 0                       | 4        | 3           | 1        | 3              | 1        | 1               | 1        |
| <b>C. Amino acid positions with sufficient variability in the ITT cohort of CYD14</b>                      |                                 |                          |            |                |                                                                                                                                                                                                                                                                                                                                                                                                                                                                                                                                                                                                                                                                                                                                                                                                                                                                                                                                                                                                                                                                                                                                                                                                                                                                                                                                                                                                                                                                                                                                                                                                                                                                                                                                                                                                             |          |          |          |                         |          |             |          |                |          |                 |          |
| <b>Endpoint</b>                                                                                            | <b>All</b>                      | <b>NAb Contact Sites</b> |            | <b>SAS Mat</b> | <b>Positions with Sufficient Variability</b>                                                                                                                                                                                                                                                                                                                                                                                                                                                                                                                                                                                                                                                                                                                                                                                                                                                                                                                                                                                                                                                                                                                                                                                                                                                                                                                                                                                                                                                                                                                                                                                                                                                                                                                                                                |          |          |          |                         |          |             |          |                |          |                 |          |
|                                                                                                            |                                 | <b>All</b>               | <b>SAS</b> |                |                                                                                                                                                                                                                                                                                                                                                                                                                                                                                                                                                                                                                                                                                                                                                                                                                                                                                                                                                                                                                                                                                                                                                                                                                                                                                                                                                                                                                                                                                                                                                                                                                                                                                                                                                                                                             |          |          |          |                         |          |             |          |                |          |                 |          |
| DENV-Any                                                                                                   | 133                             | 22                       | 65         | 65             | pr5, pr13, pr15, pr16, pr17, pr24, pr29, pr31, pr37, pr38, pr46, pr49, pr52, pr55, pr57, pr59, pr72, pr73, pr81, pr82, pr83, M16, M24, M27, M31, M34, M36, M37, M44, M45, M48, M52, M53, M57, M60, M61, M65, M70, M74, M75, E8 <sup>2</sup> , E26 <sup>2</sup> , E27 <sup>2</sup> , E28 <sup>2</sup> , E37 <sup>2</sup> , E46 <sup>2</sup> , E52 <sup>1,2</sup> , E55 <sup>2</sup> , E68 <sup>2</sup> , E71 <sup>2</sup> , E81 <sup>2</sup> , E83 <sup>1,2</sup> , E88 <sup>2</sup> , E96 <sup>2</sup> , E108 <sup>2</sup> , E120 <sup>2</sup> , E124 <sup>1,2</sup> , E128 <sup>2</sup> , E129 <sup>2</sup> , E132 <sup>2</sup> , E138 <sup>2</sup> , E140, E141, E147 <sup>2</sup> , E149 <sup>2</sup> , E154 <sup>1,2</sup> , E155 <sup>1,2</sup> , E160 <sup>2</sup> , E162 <sup>1</sup> , E163 <sup>1,2</sup> , E171 <sup>2</sup> , E174 <sup>1,2</sup> , E177 <sup>2</sup> , E186 <sup>2</sup> , E203 <sup>1,2</sup> , E204 <sup>2</sup> , E209 <sup>2</sup> , E210 <sup>2</sup> , E221, E222 <sup>2</sup> , E224 <sup>2</sup> , E225 <sup>2</sup> , E226 <sup>1,2</sup> , E227 <sup>1,2</sup> , E228 <sup>2</sup> , E233 <sup>2</sup> , E240, E241 <sup>2</sup> , E251 <sup>2</sup> , E272 <sup>2</sup> , E273 <sup>1,2</sup> , E274 <sup>1,2</sup> , E297 <sup>2</sup> , E303 <sup>1,2</sup> , E305 <sup>1,2</sup> , E312 <sup>1</sup> , E324, E329 <sup>1,2</sup> , E331 <sup>2</sup> , E338 <sup>1,2</sup> , E339, E342 <sup>2</sup> , E343 <sup>2</sup> , E345 <sup>2</sup> , E346 <sup>2</sup> , E348 <sup>2</sup> , E351 <sup>2</sup> , E359 <sup>2</sup> , E360 <sup>1,2</sup> , E378, E379, E380, E382 <sup>2</sup> , E384 <sup>1,2</sup> , E385 <sup>1,2</sup> , E390 <sup>1,2</sup> , E397, E425, E428, E429, E432, E436, E454, E455, E461, E462, E475, E478, E480, E481, E484, E492, E495 |          |          |          |                         |          |             |          |                |          |                 |          |
| DENV1                                                                                                      | 48                              | 4                        | 14         | 14             | pr13, pr17, pr29, pr37, pr38, pr46, pr49, pr59, pr72, pr83, M24, M27, M31, M45, M52, M57, M65, E8 <sup>2</sup> , E37 <sup>2</sup> , E88 <sup>2</sup> , E96 <sup>2</sup> , E112, E113, E132, E138, E155 <sup>1,2</sup> , E171, E227 <sup>1,2</sup> , E228 <sup>2</sup> , E240, E241 <sup>2</sup> , E297 <sup>2</sup> , E312 <sup>1</sup> , E324, E331 <sup>2</sup> , E338 <sup>1,2</sup> , E339, E346 <sup>2</sup> , E359 <sup>2</sup> , E378, E380, E382 <sup>2</sup> , E436, E461, E475, E480, E481, E484                                                                                                                                                                                                                                                                                                                                                                                                                                                                                                                                                                                                                                                                                                                                                                                                                                                                                                                                                                                                                                                                                                                                                                                                                                                                                                  |          |          |          |                         |          |             |          |                |          |                 |          |
| DENV2                                                                                                      | 42                              | 6                        | 23         | 23             | pr5, pr15, pr16, pr29, pr31, pr52, pr82, M36, M48, M57, M60, M70, M74, E26 <sup>2</sup> , E27, E28 <sup>2</sup> , E46 <sup>2</sup> , E52 <sup>1,2</sup> , E71 <sup>2</sup> , E83 <sup>1,2</sup> , E108 <sup>2</sup> , E129 <sup>2</sup> , E141, E149 <sup>2</sup> , E160 <sup>2</sup> , E177 <sup>2</sup> , E186 <sup>2</sup> , E203 <sup>1,2</sup> , E209 <sup>2</sup> , E210 <sup>2</sup> , E224 <sup>2</sup> , E226 <sup>1,2</sup> , E228 <sup>2</sup> , E343 <sup>2</sup> , E345 <sup>2</sup> , E346 <sup>2</sup> , E360 <sup>1,2</sup> , E379, E390 <sup>1,2</sup> , E425, E462, E484                                                                                                                                                                                                                                                                                                                                                                                                                                                                                                                                                                                                                                                                                                                                                                                                                                                                                                                                                                                                                                                                                                                                                                                                                  |          |          |          |                         |          |             |          |                |          |                 |          |
| DENV3                                                                                                      | 25                              | 8                        | 11         | 11             | pr55, pr57, M16, M37, M44, E68 <sup>2</sup> , E81 <sup>2</sup> , E124 <sup>1,2</sup> , E132, E140, E154 <sup>1,2</sup> , E162 <sup>1</sup> , E171 <sup>2</sup> , E174 <sup>1,2</sup> , E233 <sup>2</sup> , E272, E273 <sup>1,2</sup> , E303 <sup>1,2</sup> , E305 <sup>1,2</sup> , E379, E385 <sup>1,2</sup> , E454, E461, E481, E492                                                                                                                                                                                                                                                                                                                                                                                                                                                                                                                                                                                                                                                                                                                                                                                                                                                                                                                                                                                                                                                                                                                                                                                                                                                                                                                                                                                                                                                                       |          |          |          |                         |          |             |          |                |          |                 |          |
| DENV4                                                                                                      | 28                              | 7                        | 11         | 11             | pr15, pr73, pr83, M36, M53, M61, M65, E46 <sup>2</sup> , E96 <sup>2</sup> , E120 <sup>2</sup> , E128, E140, E155 <sup>1,2</sup> , E160, E162 <sup>1</sup> , E203 <sup>1,2</sup> , E221, E227 <sup>1,2</sup> , E233 <sup>2</sup> , E274 <sup>1,2</sup> , E329 <sup>1,2</sup> , E342 <sup>2</sup> , E351, E384 <sup>1,2</sup> , E429, E455, E461, E478                                                                                                                                                                                                                                                                                                                                                                                                                                                                                                                                                                                                                                                                                                                                                                                                                                                                                                                                                                                                                                                                                                                                                                                                                                                                                                                                                                                                                                                        |          |          |          |                         |          |             |          |                |          |                 |          |
| <b>D. Amino acid positions with sufficient variability in the ITT cohort of CYD15</b>                      |                                 |                          |            |                |                                                                                                                                                                                                                                                                                                                                                                                                                                                                                                                                                                                                                                                                                                                                                                                                                                                                                                                                                                                                                                                                                                                                                                                                                                                                                                                                                                                                                                                                                                                                                                                                                                                                                                                                                                                                             |          |          |          |                         |          |             |          |                |          |                 |          |
| <b>Endpoint</b>                                                                                            | <b>All</b>                      | <b>NAb Contact Sites</b> |            | <b>SAS Mat</b> | <b>Positions with Sufficient Variability</b>                                                                                                                                                                                                                                                                                                                                                                                                                                                                                                                                                                                                                                                                                                                                                                                                                                                                                                                                                                                                                                                                                                                                                                                                                                                                                                                                                                                                                                                                                                                                                                                                                                                                                                                                                                |          |          |          |                         |          |             |          |                |          |                 |          |
|                                                                                                            |                                 | <b>All</b>               | <b>SAS</b> |                |                                                                                                                                                                                                                                                                                                                                                                                                                                                                                                                                                                                                                                                                                                                                                                                                                                                                                                                                                                                                                                                                                                                                                                                                                                                                                                                                                                                                                                                                                                                                                                                                                                                                                                                                                                                                             |          |          |          |                         |          |             |          |                |          |                 |          |
| DENV-Any                                                                                                   | 89                              | 16                       | 44         | 44             | pr13, pr15, pr17, pr24, pr29, pr37, pr39, pr55, pr57, pr58, pr83, pr89, M24, M29, M31, M34, M36, M47, M60, M69, M75, E8 <sup>2</sup> , E28 <sup>2</sup> , E37 <sup>2</sup> , E55 <sup>2</sup> , E58 <sup>1,2</sup> , E64 <sup>1,2</sup> , E81 <sup>2</sup> , E83 <sup>1,2</sup> , E91, E114, E118 <sup>2</sup> , E120 <sup>2</sup> , E124 <sup>1,2</sup> , E132 <sup>2</sup> , E139, E141, E147 <sup>2</sup> , E154 <sup>1,2</sup> , E155 <sup>1,2</sup> , E160 <sup>2</sup> , E161 <sup>1,2</sup> , E164, E170 <sup>2</sup> , E171 <sup>2</sup> , E201, E203 <sup>1,2</sup> , E204 <sup>2</sup> , E222 <sup>2</sup> , E225 <sup>2</sup> , E229 <sup>2</sup> , E251 <sup>2</sup> , E283, E291 <sup>2</sup> , E293 <sup>1,2</sup> , E297 <sup>2</sup> , E303 <sup>1,2</sup> , E304 <sup>2</sup> , E305 <sup>1,2</sup> , E308 <sup>1,2</sup> , E324, E331 <sup>2</sup> , E338 <sup>1,2</sup> , E340 <sup>2</sup> , E347 <sup>2</sup> , E351 <sup>2</sup> , E354 <sup>2</sup> , E357 <sup>2</sup> , E359 <sup>2</sup> , E360 <sup>1,2</sup> , E369, E384 <sup>1,2</sup> , E385 <sup>1,2</sup> , E394 <sup>2</sup> , E397, E404, E425, E428, E436, E439, E454, E455, E461, E462, E475, E480, E484, E492, E495                                                                                                                                                                                                                                                                                                                                                                                                                                                                                                                                                                                                   |          |          |          |                         |          |             |          |                |          |                 |          |
| DENV1                                                                                                      | 25                              | 4                        | 7          | 7              | pr13, pr17, pr29, pr37, pr55, pr83, pr89, M24, M31, M36, M47, E8 <sup>2</sup> , E55 <sup>2</sup> , E83 <sup>1,2</sup> , E293 <sup>1,2</sup> , E297 <sup>2</sup> , E305 <sup>1</sup> , E338 <sup>1,2</sup> , E394 <sup>2</sup> , E425, E428, E436, E439, E454, E475                                                                                                                                                                                                                                                                                                                                                                                                                                                                                                                                                                                                                                                                                                                                                                                                                                                                                                                                                                                                                                                                                                                                                                                                                                                                                                                                                                                                                                                                                                                                          |          |          |          |                         |          |             |          |                |          |                 |          |
| DENV2                                                                                                      | 11                              | 1                        | 6          | 6              | M60, E28 <sup>2</sup> , E83 <sup>1,2</sup> , E118, E120 <sup>2</sup> , E170 <sup>2</sup> , E324, E347 <sup>2</sup> , E359 <sup>2</sup> , E404, E462                                                                                                                                                                                                                                                                                                                                                                                                                                                                                                                                                                                                                                                                                                                                                                                                                                                                                                                                                                                                                                                                                                                                                                                                                                                                                                                                                                                                                                                                                                                                                                                                                                                         |          |          |          |                         |          |             |          |                |          |                 |          |
| DENV3                                                                                                      | 6                               | 0                        | 2          | 2              | pr58, M69, E132, E139, E304 <sup>2</sup> , E331 <sup>2</sup>                                                                                                                                                                                                                                                                                                                                                                                                                                                                                                                                                                                                                                                                                                                                                                                                                                                                                                                                                                                                                                                                                                                                                                                                                                                                                                                                                                                                                                                                                                                                                                                                                                                                                                                                                |          |          |          |                         |          |             |          |                |          |                 |          |
| DENV4                                                                                                      | 8                               | 2                        | 3          | 3              | pr15, E58 <sup>1</sup> , E160, E201, E203 <sup>1,2</sup> , E229 <sup>2</sup> , E283, E291 <sup>2</sup>                                                                                                                                                                                                                                                                                                                                                                                                                                                                                                                                                                                                                                                                                                                                                                                                                                                                                                                                                                                                                                                                                                                                                                                                                                                                                                                                                                                                                                                                                                                                                                                                                                                                                                      |          |          |          |                         |          |             |          |                |          |                 |          |

\*V = Vaccine; P = Placebo.

<sup>1</sup> Neutralizing antibody (NAb) contact site

<sup>2</sup> Surface-accessible (SAS  $\geq 0.25$ ) position on the mature virion

**Table S2. Vaccine efficacy against DENV2 with a vaccine-matched and mismatched residue at amino acid position E226 in the ITT cohorts of (A) CYD14, 2–8-year-olds; (B) CYD14, 9–14-year-olds; (C) CYD14, pooling over both age categories; and (D) CYD15.**

| <b>A. CYD14 2–8-Year-Old Participants Only</b>  |                                       |               |                 |                                |
|-------------------------------------------------|---------------------------------------|---------------|-----------------|--------------------------------|
| <b>Residue</b>                                  | <b>Vaccine Residue Match/Mismatch</b> | <b>VE (%)</b> | <b>95% CI</b>   | <b>Differential VE P-Value</b> |
| T                                               | Match                                 | 66.0          | (34.5, 82.4)    | 0.015                          |
| K                                               | Mismatch                              | 1.7           | (-60.5, 39.7)   |                                |
| <b>B. CYD14 9–14-Year-Old Participants Only</b> |                                       |               |                 |                                |
| <b>Residue</b>                                  | <b>Vaccine Residue Match/Mismatch</b> | <b>VE (%)</b> | <b>95% CI</b>   | <b>Differential VE P-Value</b> |
| T                                               | Match                                 | -35.5         | (-763.1, 78.7)  | 0.40                           |
| K                                               | Mismatch                              | 43.5          | (1.7, 67.5)     |                                |
| <b>C. CYD14 Pooled Over Both Age Categories</b> |                                       |               |                 |                                |
| <b>Residue</b>                                  | <b>Vaccine Residue Match/Mismatch</b> | <b>VE (%)</b> | <b>95% CI</b>   | <b>Differential VE P-Value</b> |
| T                                               | Match                                 | 57.0          | (17.8, 77.5)    | 0.15                           |
| K                                               | Mismatch                              | 25.6          | (-5.8, 47.7)    |                                |
| <b>D. CYD15</b>                                 |                                       |               |                 |                                |
| <b>Residue</b>                                  | <b>Vaccine Residue Match/Mismatch</b> | <b>VE (%)</b> | <b>95% CI</b>   | <b>Differential VE P-Value</b> |
| T                                               | Match                                 | 50.7          | (32.9, 63.7)    | -                              |
| K                                               | Mismatch                              | 33.1          | (-1109.0, 96.3) |                                |

**Table S3. Estimated ratios between (A) serotypes of the mean percent residue mismatch<sup>1</sup> in the ITT cohort of CYD14 (left) and the ITT cohort of CYD15 (right), (B) vaccine-matched vs. mismatched genotypes of the mean percent residue mismatch<sup>1</sup> in CYD14, and (C) serotypes of the vaccine strains' mean 9-mer coverage<sup>2</sup> of placebo recipient dengue sequences in the ITT cohort of CYD14 (left) and CYD15 (right)**

| <b>A. Estimated ratios between serotypes of the mean percent residue mismatch</b>                                         |                           |               |                   |                           |               |
|---------------------------------------------------------------------------------------------------------------------------|---------------------------|---------------|-------------------|---------------------------|---------------|
| <b>Percent residue mismatch in all aligned sites*</b>                                                                     |                           |               |                   |                           |               |
| <b>CYD14</b>                                                                                                              |                           |               | <b>CYD15</b>      |                           |               |
| <b>Comparison</b>                                                                                                         | <b>Ratio of Means (%)</b> | <b>95% CI</b> | <b>Comparison</b> | <b>Ratio of Means (%)</b> | <b>95% CI</b> |
| DENV1 / DENV2                                                                                                             | 1.01                      | (0.96, 1.06)  | DENV1 / DENV2     | 1.09                      | (1.06, 1.11)  |
| DENV1 / DENV3                                                                                                             | 1.27                      | (1.21, 1.34)  | DENV1 / DENV3     | 1.20                      | (1.17, 1.22)  |
| DENV1 / DENV4                                                                                                             | 2.01                      | (1.80, 2.26)  | DENV1 / DENV4     | 1.58                      | (1.53, 1.62)  |
| DENV2 / DENV3                                                                                                             | 1.26                      | (1.19, 1.33)  | DENV2 / DENV3     | 1.10                      | (1.08, 1.12)  |
| DENV2 / DENV4                                                                                                             | 1.99                      | (1.78, 2.24)  | DENV2 / DENV4     | 1.45                      | (1.41, 1.49)  |
| DENV3 / DENV4                                                                                                             | 1.58                      | (1.41, 1.78)  | DENV3 / DENV4     | 1.32                      | (1.29, 1.35)  |
| <b>Percent residue mismatch in NAb contact sites</b>                                                                      |                           |               |                   |                           |               |
| <b>CYD14</b>                                                                                                              |                           |               | <b>CYD15</b>      |                           |               |
| <b>Comparison</b>                                                                                                         | <b>Ratio of Means (%)</b> | <b>95% CI</b> | <b>Comparison</b> | <b>Ratio of Means (%)</b> | <b>95% CI</b> |
| DENV1 / DENV2                                                                                                             | 0.35                      | (0.31, 0.41)  | DENV1 / DENV2     | 1.16                      | (1.10, 1.22)  |
| DENV1 / DENV3                                                                                                             | 0.29                      | (0.25, 0.34)  | DENV1 / DENV3     | 0.60                      | (0.57, 0.63)  |
| DENV1 / DENV4                                                                                                             | 0.64                      | (0.53, 0.78)  | DENV1 / DENV4     | 1.13                      | (1.07, 1.19)  |
| DENV2 / DENV3                                                                                                             | 0.83                      | (0.71, 0.96)  | DENV2 / DENV3     | 0.52                      | (0.50, 0.53)  |
| DENV2 / DENV4                                                                                                             | 1.80                      | (1.50, 2.21)  | DENV2 / DENV4     | 0.97                      | (0.94, 1.01)  |
| DENV3 / DENV4                                                                                                             | 2.18                      | (1.79, 2.68)  | DENV3 / DENV4     | 1.87                      | (1.82, 1.93)  |
| <b>Percent residue mismatch in surface-exposed sites on the mature virion</b>                                             |                           |               |                   |                           |               |
| <b>CYD14</b>                                                                                                              |                           |               | <b>CYD15</b>      |                           |               |
| <b>Comparison</b>                                                                                                         | <b>Ratio of Means (%)</b> | <b>95% CI</b> | <b>Comparison</b> | <b>Ratio of Means (%)</b> | <b>95% CI</b> |
| DENV1 / DENV2                                                                                                             | 0.85                      | (0.80, 0.90)  | DENV1 / DENV2     | 1.99                      | (1.89, 2.10)  |
| DENV1 / DENV3                                                                                                             | 0.94                      | (0.88, 1.01)  | DENV1 / DENV3     | 0.91                      | (0.87, 0.94)  |
| DENV1 / DENV4                                                                                                             | 1.90                      | (1.63, 2.27)  | DENV1 / DENV4     | 1.40                      | (1.35, 1.45)  |
| DENV2 / DENV3                                                                                                             | 1.11                      | (1.04, 1.19)  | DENV2 / DENV3     | 0.45                      | (0.43, 0.48)  |
| DENV2 / DENV4                                                                                                             | 2.24                      | (1.91, 2.69)  | DENV2 / DENV4     | 0.70                      | (0.67, 0.74)  |
| DENV3 / DENV4                                                                                                             | 2.02                      | (1.72, 2.42)  | DENV3 / DENV4     | 1.55                      | (1.51, 1.59)  |
| <b>B. Estimated ratios between vaccine-matched vs. mismatched genotypes of the mean percent residue mismatch in CYD14</b> |                           |               |                   |                           |               |
| <b>Percent residue mismatch in all aligned sites*</b>                                                                     |                           |               |                   |                           |               |
| <b>Comparison</b>                                                                                                         | <b>Ratio of Means (%)</b> |               | <b>95% CI</b>     |                           |               |
| DENV1-I / DENV1-IV                                                                                                        | 0.64                      |               | (0.61, 0.67)      |                           |               |
| DENV2-Asian I / DENV2-Cosmopolitan                                                                                        | 0.79                      |               | (0.74, 0.83)      |                           |               |
| DENV3-II / DENV3-I/III                                                                                                    | 0.68                      |               | (0.56, 0.80)      |                           |               |
| DENV4-II / DENV4-I                                                                                                        | 0.43                      |               | (0.39, 0.47)      |                           |               |
| <b>Percent residue mismatch in NAb contact sites</b>                                                                      |                           |               |                   |                           |               |
| <b>Comparison</b>                                                                                                         | <b>Ratio of Means (%)</b> |               | <b>95% CI</b>     |                           |               |
| DENV1-I / DENV1-IV                                                                                                        | 0.47                      |               | (0.33, 0.62)      |                           |               |
| DENV2-Asian I / DENV2-Cosmopolitan                                                                                        | 0.7                       |               | (0.61, 0.81)      |                           |               |
| DENV3-II / DENV3-I/III                                                                                                    | -†                        |               | -                 |                           |               |
| DENV4-II / DENV4-I                                                                                                        | 0.43                      |               | (0.39, 0.48)      |                           |               |
| <b>Percent residue mismatch in surface-exposed sites on the mature virion</b>                                             |                           |               |                   |                           |               |
| <b>Comparison</b>                                                                                                         | <b>Ratio of Means (%)</b> |               | <b>95% CI</b>     |                           |               |
| DENV1-I / DENV1-IV                                                                                                        | 0.73                      |               | (0.67, 0.80)      |                           |               |
| DENV2-Asian I / DENV2-Cosmopolitan                                                                                        | 0.98                      |               | (0.90, 1.07)      |                           |               |
| DENV3-II / DENV3-I/III                                                                                                    | 0.64                      |               | (0.52, 0.77)      |                           |               |
| DENV4-II / DENV4-I                                                                                                        | 0.29                      |               | (0.23, 0.36)      |                           |               |
| <b>C. Estimated ratios between serotypes of the mean 9-mer coverage</b>                                                   |                           |               |                   |                           |               |
| <b>CYD14</b>                                                                                                              |                           |               | <b>CYD15</b>      |                           |               |
| <b>Comparison</b>                                                                                                         | <b>Ratio of Means (%)</b> | <b>95% CI</b> | <b>Comparison</b> | <b>Ratio of Means (%)</b> | <b>95% CI</b> |
| DENV2 / DENV1                                                                                                             | 1.02                      | (1.01, 1.04)  | DENV2 / DENV1     | 1.04                      | (1.03, 1.04)  |
| DENV3 / DENV1                                                                                                             | 1.07                      | (1.05, 1.08)  | DENV3 / DENV1     | 1.05                      | (1.05, 1.06)  |
| DENV4 / DENV1                                                                                                             | 1.15                      | (1.13, 1.17)  | DENV4 / DENV1     | 1.13                      | (1.12, 1.13)  |
| DENV3 / DENV2                                                                                                             | 1.04                      | (1.03, 1.05)  | DENV3 / DENV2     | 1.02                      | (1.01, 1.02)  |
| DENV4 / DENV2                                                                                                             | 1.13                      | (1.11, 1.15)  | DENV4 / DENV2     | 1.09                      | (1.08, 1.09)  |
| DENV4 / DENV3                                                                                                             | 1.08                      | (1.06, 1.10)  | DENV4 / DENV3     | 1.07                      | (1.07, 1.07)  |

<sup>1</sup> The mean percent residue mismatch is estimated based on placebo recipient dengue AA sequences to the amino acid sequence encoded by the corresponding serotype vaccine insert.

<sup>2</sup> The mean 9-mer coverage refers to the mean proportion of 9-mers in placebo recipient dengue sequences with a match in the vaccine sequence of the same serotype.

\* The only alignment gap reflects that DENV3 sequences are characteristically missing AA at alignment positions 322 and 323.

† A constant percent residue mismatch in DENV3-II placebo cases AA, amino acid.



**Table S4. Numbers of VCD endpoint cases in (A) 2-8 year-olds and (B) 9-14 year-olds in the ITT cohort of CYD14.**

| <b>A. 2-8 year-old participants in CYD14</b>  |                      |                   |                  |                            |                  |
|-----------------------------------------------|----------------------|-------------------|------------------|----------------------------|------------------|
| Serotype                                      | Genotype             | DENV-Any Endpoint |                  | Serotype-Specific Endpoint |                  |
|                                               |                      | Vaccine<br>N (%)  | Placebo<br>N (%) | Vaccine<br>N (%)           | Placebo<br>N (%) |
| Total                                         |                      | 196               | 173              | -                          | -                |
| DENV1                                         |                      | 80 (40.8)         | 70 (40.5)        | 80                         | 74               |
|                                               | I*                   | 9 (11.2)          | 9 (12.9)         | 9 (11.2)                   | 10 (13.5)        |
|                                               | IV                   | 32 (40.0)         | 31 (44.3)        | 32 (40.0)                  | 32 (43.2)        |
|                                               | Missing <sup>†</sup> | 39 (48.8)         | 30 (42.9)        | 39 (48.8)                  | 32 (43.2)        |
| DENV2                                         |                      | 63 (32.1)         | 44 (25.4)        | 64                         | 48               |
|                                               | Asian I*             | 15 (23.8)         | 6 (13.6)         | 16 (25.0)                  | 6 (12.5)         |
|                                               | Cosmopolitan         | 23 (36.5)         | 14 (31.8)        | 23 (35.9)                  | 17 (35.4)        |
|                                               | Missing <sup>†</sup> | 25 (39.7)         | 24 (54.5)        | 25 (39.1)                  | 25 (52.1)        |
| DENV3                                         |                      | 19 (9.7)          | 25 (14.5)        | 19                         | 25               |
|                                               | I                    | 5 (26.3)          | 8 (32.0)         | 5 (26.3)                   | 8 (32.0)         |
|                                               | II*                  | 0 (0.0)           | 1 (4.0)          | 0 (0.0)                    | 1 (4.0)          |
|                                               | III                  | 3 (15.8)          | 5 (20.0)         | 3 (15.8)                   | 5 (20.0)         |
|                                               | Missing <sup>†</sup> | 11 (57.9)         | 11 (44.0)        | 11 (57.9)                  | 11 (44.0)        |
| DENV4                                         |                      | 29 (14.8)         | 29 (16.8)        | 30                         | 31               |
|                                               | I                    | 16 (55.2)         | 6 (20.7)         | 16 (53.3)                  | 6 (19.4)         |
|                                               | II*                  | 4 (13.8)          | 9 (31.0)         | 5 (16.7)                   | 10 (32.3)        |
|                                               | Missing <sup>†</sup> | 9 (31.0)          | 14 (48.3)        | 9 (30.0)                   | 15 (48.4)        |
| Missing <sup>‡</sup>                          | 5 (2.6)              | 5 (2.9)           | -                | -                          |                  |
| <b>B. 9-14 year-old participants in CYD14</b> |                      |                   |                  |                            |                  |
| Serotype                                      | Genotype             | DENV-Any Endpoint |                  | Serotype-Specific Endpoint |                  |
|                                               |                      | Vaccine<br>N (%)  | Placebo<br>N (%) | Vaccine<br>N (%)           | Placebo<br>(%)   |
| Total                                         |                      | 90                | 136              | -                          | -                |
| DENV1                                         |                      | 36 (40.0)         | 49 (36.0)        | 36                         | 52               |
|                                               | I*                   | 6 (16.7)          | 7 (14.3)         | 6 (16.7)                   | 8 (15.4)         |
|                                               | IV                   | 8 (22.2)          | 19 (38.8)        | 8 (22.2)                   | 19 (36.5)        |
|                                               | Missing <sup>†</sup> | 22 (61.1)         | 23 (46.9)        | 22 (61.1)                  | 25 (48.1)        |
| DENV2                                         |                      | 31 (34.4)         | 26 (19.1)        | 33                         | 26               |
|                                               | Asian I*             | 11 (35.5)         | 9 (34.6)         | 12 (36.4)                  | 9 (34.6)         |
|                                               | Cosmopolitan         | 4 (12.9)          | 4 (15.4)         | 5 (15.2)                   | 4 (15.4)         |
|                                               | Missing <sup>†</sup> | 16 (51.6)         | 13 (50.0)        | 16 (48.5)                  | 13 (50.0)        |
| DENV3                                         |                      | 11 (12.2)         | 18 (13.2)        | 11                         | 18               |
|                                               | I                    | 4 (36.4)          | 6 (33.3)         | 4 (36.4)                   | 6 (33.3)         |
|                                               | II*                  | 0 (0.0)           | 3 (16.7)         | 0 (0.0)                    | 3 (16.7)         |
|                                               | III                  | 1 (9.1)           | 2 (11.1)         | 1 (9.1)                    | 2 (11.1)         |
|                                               | Missing <sup>†</sup> | 6 (54.5)          | 7 (38.9)         | 6 (54.5)                   | 7 (38.9)         |
| DENV4                                         |                      | 10 (11.1)         | 41 (30.1)        | 10                         | 41               |
|                                               | I                    | 3 (30.0)          | 12 (29.3)        | 3 (30.0)                   | 12 (29.3)        |
|                                               | II*                  | 3 (30.0)          | 14 (34.1)        | 3 (30.0)                   | 14 (34.1)        |
|                                               | Missing <sup>†</sup> | 4 (40.0)          | 15 (36.6)        | 4 (40.0)                   | 15 (36.6)        |
| Missing <sup>‡</sup>                          | 2 (2.2)              | 2 (1.5)           | -                | -                          |                  |

\* This genotype is contained in the vaccine.

† Sequences were unobtainable due to either a DENV titer below the lower limit of quantification, insufficient volume of unthawed serum, or a lack of participant consent. Some participants with VCD were found to be positive for more than one serotype. These participants were included in the analysis for each appropriate endpoint. For the DENV-Any endpoint, the sequence from the earliest-documented VCD event was included for analysis.

‡ Participants were confirmed as VCD cases, but the infecting strains could not be positively serotyped. These participants were not included in the analysis, as their sequences could not be imputed without serotype information.

## References

1. Dassault Systèmes BIOVIA (2016) Discovery Studio Modeling Environment, Release 2017. San Diego: Dassault Systèmes.
2. Nivarthi UK, Kose N, Sapparapu G, et al. Mapping the Human Memory B Cell and Serum Neutralizing Antibody Responses to Dengue Virus Serotype 4 Infection and Vaccination. *J Virol* 2017; 91(5).
